# Supplementary material
Source: PubMed Central journal article supplement (PMC7289148)
Supplement: NIHMS1589295-supplement-Supporting_info.pdf [file NIHMS1589295-supplement-Supporting_info.pdf]

**Supporting Information for:**

**Comparison of Nine Programs Predicting  $pK_a$  Values of  
Pharmaceutical Substances**

Chenzhong Liao, and Marc C. Nicklaus\*

*Chemical Biology Laboratory, Center for Cancer Research, National Cancer Institute,  
National Institutes of Health, DHHS, NCI-Frederick, 376 Boyles St., Frederick, MD  
21702, USA*

\* Corresponding author. Tel.: +1 301 846 5903; fax: +1 301 846 6033; e-mail:  
mnl@helix.nih.gov.

**Table S1.** Experimental and Calculated pK<sub>a</sub> Values of the Protonation Sites in the Data Set Used in This Study

| Cpds      | pK <sub>a</sub><br>value(s) | Ionization<br>type | Data<br>quality | ACD/pK <sub>a</sub> |                  | ADME<br>Boxes |      | ADMET<br>Predictor |       | Epik  |       | Jaguar       |      | Marvin |       | Pallas |       | Pipeline<br>Pilot |       | SPARC |       |      |       |
|-----------|-----------------------------|--------------------|-----------------|---------------------|------------------|---------------|------|--------------------|-------|-------|-------|--------------|------|--------|-------|--------|-------|-------------------|-------|-------|-------|------|-------|
|           |                             |                    |                 | Cal                 | Dev <sup>a</sup> | Cal           | Dev  | Cal                | Dev   | Cal   | Dev   | Cal          | Dev  | Cal    | Dev   | Cal    | Dev   | Cal               | Dev   | Cal   | Dev   | Cal  | Dev   |
|           |                             |                    |                 | <b>1</b>            | 9.63             | -H            | A    | 9.86               | 0.23  | 9.8   | 0.2   | 10.02        | 0.39 | 10.12  | 0.49  | 10.0   | 0.4   | 9.46              | -0.17 | 9.48  | -0.15 | 9.50 | -0.13 |
| <b>2</b>  | 4.756                       | -H                 | R               | 4.79                | 0.03             | 4.7           | -0.1 | 4.00               | -0.76 | 4.76  | 0.00  | 4.0          | -0.8 | 4.54   | -0.22 | 4.66   | -0.10 | 4.76              | 0.00  | 4.77  | 0.01  |      |       |
| <b>3</b>  | 3.742                       | -H                 | R               | 3.74                | -0.00            | 3.6           | -0.1 | 3.86               | 0.12  | 3.71  | -0.03 | 3.3          | -0.4 | 4.27   | 0.53  | 4.66   | 0.92  | <sup>b</sup>      | -     | 3.75  | 0.01  |      |       |
| <b>4</b>  | 4.874                       | -H                 | R               | 4.79                | -0.08            | 4.9           | 0.0  | 4.33               | -0.54 | 4.76  | -0.11 | 4.4          | -0.5 | 4.75   | -0.12 | 4.81   | -0.06 | 4.87              | 0.00  | 4.75  | -0.12 |      |       |
| <b>5</b>  | 12.35 <sup>c</sup>          | -H                 | A               | 13.6                | 1.25             | 12.9          | 0.6  | 12.16              | -0.19 | 12.87 | 0.52  | 12.2         | -0.2 | 13.17  | 0.82  | 14.88  | 2.53  | <sup>b</sup>      | -     | 12.50 | 0.15  |      |       |
| <b>6</b>  | 3.28                        | +H                 | A               | 4.67                | 1.39             | 3.3           | 0.0  | 1.96               | -1.32 | 3.73  | 0.45  | 5.0          | 1.7  | 3.58   | 0.30  | 5.69   | 2.41  | <sup>b</sup>      | -     | 3.18  | -0.10 |      |       |
|           | 9.93                        | -H                 | A               | 17.00               | 7.07             | 9.8           | -0.1 | 11.59              | 1.66  | 11.33 | 1.40  | <sup>b</sup> | -    | 11.13  | 1.20  | 13.25  | 3.32  | <sup>b</sup>      | -     | 8.41  | -1.52 |      |       |
| <b>7</b>  | 10.58                       | +H                 | A               | 10.76               | 0.18             | 10.4          | -0.2 | 10.08              | -0.50 | 12.06 | 1.48  | 10.2         | -0.4 | 10.71  | 0.13  | 10.72  | 0.14  | 10.63             | 0.05  | 10.40 | -0.18 |      |       |
| <b>8</b>  | 2.501                       | +H                 | R               | 2.51                | 0.01             | 2.1           | -0.4 | 2.53               | 0.03  | 2.84  | 0.34  | <sup>d</sup> | 0.4  | 2.69   | 0.19  | 2.04   | -0.46 | 2.19              | -0.31 | 2.36  | -0.14 |      |       |
|           | 4.874                       | -H                 | R               | 4.86                | -0.01            | 5.0           | 0.1  | 4.72               | -0.15 | 4.49  | -0.38 | <sup>d</sup> | -1.0 | 4.77   | -0.10 | 5.17   | 0.30  | 3.16              | -1.71 | 4.76  | -0.11 |      |       |
| <b>9</b>  | 2.3                         | -H                 | A               | 2.42                | 0.12             | 3.6           | 1.3  | 2.42               | 0.12  | 2.56  | 0.26  | 7.4          | 5.1  | 2.92   | 0.62  | 2.25   | -0.05 | 6.50              | 4.20  | 3.18  | 0.88  |      |       |
|           | 4.9                         | +H                 | A               | 5.69                | 0.79             | 6.7           | 1.8  | 6.61               | 1.71  | 7.79  | 2.89  | 5.3          | 0.4  | 7.40   | 2.50  | 6.93   | 2.03  | 2.97              | -1.93 | 7.17  | 2.27  |      |       |
| <b>10</b> | 5.06                        | +H                 | A               | 4.50                | -0.56            | 4.7           | -0.4 | 4.05               | -1.01 | 6.75  | 1.69  | <sup>b</sup> | -    | 0.98   | -4.08 | 4.70   | -0.36 | 5.00              | -0.06 | 4.23  | -0.83 |      |       |
| <b>11</b> | 9.94                        | +H                 | A               | 9.94                | 0.00             | 9.9           | -0.0 | 9.86               | -0.08 | 10.04 | 0.10  | 9.1          | -0.8 | 10.01  | 0.07  | 9.81   | -0.13 | 9.91              | -0.03 | 9.96  | 0.02  |      |       |
| <b>12</b> | 9.7                         | +H                 | A               | 10.53               | 0.83             | 8.9           | -0.8 | 9.41               | -0.29 | 10.04 | 0.34  | <sup>d</sup> | -    | 9.80   | 0.10  | 10.37  | 0.67  | 9.73              | 0.03  | 9.57  | -0.13 |      |       |
| <b>13</b> | 9.86                        | +H                 | A               | 10.00               | 0.14             | 9.5           | -0.4 | 9.70               | -0.16 | 10.04 | 0.18  | 8.8          | -1.1 | 9.99   | 0.13  | 9.45   | -0.41 | 10.66             | 0.80  | 10.08 | 0.22  |      |       |
| <b>14</b> | 9.99                        | +H                 | A               | 10.00               | 0.01             | 9.6           | -0.4 | 9.71               | -0.28 | 10.04 | 0.05  | 9.2          | -0.8 | 10.04  | 0.05  | 9.45   | -0.54 | 9.52              | -0.47 | 10.32 | 0.33  |      |       |
| <b>15</b> | 2.735                       | -H                 | A               | 2.44                | -0.30            | 2.8           | 0.1  | 3.09               | 0.36  | 2.70  | -0.04 | 3.1          | 0.4  | 2.89   | 0.16  | 2.54   | -0.20 | 3.00              | 0.27  | 3.56  | 0.83  |      |       |
| <b>16</b> | 2.62                        | -H                 | A               | 2.45                | -0.17            | 2.6           | -0.0 | 2.92               | 0.30  | 2.73  | 0.11  | 7.1          | 4.5  | 2.80   | 0.18  | 2.55   | -0.07 | 3.00              | 0.38  | 3.49  | 0.87  |      |       |
| <b>17</b> | 2.65                        | -H                 | A               | 2.44                | -0.21            | 2.6           | -0.0 | 2.91               | 0.26  | 2.66  | 0.01  | 8.3          | 5.7  | 2.74   | 0.09  | 2.54   | -0.11 | 3.00              | 0.35  | 3.51  | 0.86  |      |       |

|           |        |    |    |       |       |              |      |       |       |       |       |              |      |       |       |       |       |              |       |       |       |
|-----------|--------|----|----|-------|-------|--------------|------|-------|-------|-------|-------|--------------|------|-------|-------|-------|-------|--------------|-------|-------|-------|
|           | 7.25   | +H | A  | 6.81  | -0.44 | 7.2          | -0.0 | 7.00  | -0.25 | 7.27  | 0.02  | 4.4          | -2.9 | 7.44  | 0.19  | 7.10  | -0.15 | 7.02         | -0.23 | 6.82  | -0.43 |
| <b>18</b> | 2.72   | -H | A  | 2.45  | -0.27 | 2.8          | 0.1  | 3.14  | 0.42  | 2.67  | -0.05 | 3.4          | 0.7  | 3.03  | 0.31  | 2.55  | -0.17 | 3.00         | 0.28  | 3.57  | 0.85  |
| <b>19</b> | 2.68   | -H | A  | 2.45  | -0.23 | 2.6          | -0.1 | 2.98  | 0.30  | 2.68  | 0.00  | 9.0          | 6.3  | 2.80  | 0.12  | 2.56  | -0.12 | 3.00         | 0.32  | 3.49  | 0.81  |
| <b>20</b> | 2.73   | -H | A  | 2.44  | -0.29 | 2.8          | 0.1  | 3.13  | 0.40  | 2.70  | -0.03 | 3.6          | 0.9  | 2.97  | 0.24  | 2.54  | -0.19 | 3.00         | 0.27  | 3.52  | 0.79  |
| <b>21</b> | 9.07   | +H | A  | 8.44  | -0.63 | 9.1          | 0.0  | 8.84  | -0.23 | 10.88 | 1.81  | 8.7          | -0.4 | 8.61  | -0.46 | 9.15  | 0.08  | 8.89         | -0.18 | 9.70  | 0.63  |
| <b>22</b> | 7.64   | +H | A  | 7.84  | 0.20  | 7.1          | -0.5 | 7.61  | -0.03 | 7.23  | -0.41 | 8.6          | 1.0  | 7.73  | 0.09  | 6.92  | -0.72 | 7.80         | 0.16  | 8.18  | 0.54  |
| <b>23</b> | 4.13   | -H | A  | 4.09  | -0.04 | 5.1          | 1.0  | 5.51  | 1.38  | 3.35  | -0.78 | 4.4          | 0.3  | 3.52  | -0.61 | 3.94  | -0.19 | 11.56        | 7.43  | 3.96  | -0.17 |
|           | 11.39  | -H | A  | 11.08 | -0.31 | <sup>b</sup> | -    | 10.32 | -1.07 | 11.13 | -0.26 | 15.9         | 4.5  | 8.32  | -3.07 | 12.78 | 1.39  | 4.17         | -7.22 | 11.00 | -0.39 |
| <b>24</b> | 3.47   | -H | A  | 3.48  | 0.01  | 3.6          | -0.3 | 4.29  | 0.82  | 4.57  | 1.10  | 3.9          | 0.4  | 3.41  | -0.06 | 3.83  | 0.36  | 3.48         | 0.01  | 3.62  | 0.15  |
| <b>25</b> | 9.58   | +H | A  | 9.43  | -0.15 | 9.3          | 0.7  | 9.35  | -0.23 | 9.09  | -0.49 | 9.1          | -0.5 | 9.67  | 0.09  | 10.08 | 0.50  | 9.60         | 0.02  | 9.05  | -0.53 |
| <b>26</b> | 3.19   | -H | A  | 3.71  | 0.52  | 2.7          | -0.1 | 3.20  | 0.01  | 4.43  | 1.24  | 5.7          | 2.5  | 8.53  | 5.34  | 3.25  | 0.06  | 3.63         | 0.44  | 3.09  | -0.10 |
|           | 7.87   | +H | A  | 7.55  | -0.32 | 7.8          | 0.1  | 7.80  | -0.07 | 8.24  | 0.37  | 11.5         | 3.6  | 14.80 | 6.93  | 8.12  | 0.25  | 8.92         | 1.05  | 7.27  | -0.60 |
| <b>27</b> | 7.905  | -H | A  | 8.29  | 0.38  | 8.6          | -0.4 | 7.64  | -0.27 | 8.17  | 0.27  | <sup>b</sup> | -    | 8.65  | 0.75  | 8.07  | 0.17  | <sup>b</sup> | -     | 9.10  | 1.20  |
| <b>28</b> | 5.68   | -H | A  | 5.38  | -0.30 | 5.3          | -0.3 | 6.41  | 0.73  | 3.96  | -1.72 | 4.1          | -1.6 | 3.35  | -2.33 | 5.72  | 0.04  | 4.00         | -1.68 | 3.74  | -1.94 |
| <b>29</b> | 5.55   | -H | A  | 5.38  | -0.17 | 5.3          | -0.3 | 5.90  | 0.35  | 3.99  | -1.56 | 3.6          | -2.0 | 3.25  | -2.30 | 5.78  | 0.23  | 4.00         | -1.55 | 3.77  | -1.78 |
| <b>30</b> | 8.505  | -H | A  | 7.90  | -0.61 | 8.7          | 0.2  | 8.11  | -0.40 | 7.40  | -1.11 | 7.5          | -1.0 | 6.99  | -1.52 | 7.90  | -0.61 | 3.89         | -4.62 | 7.30  | -1.21 |
| <b>31</b> | 8.28   | -H | A  | 7.91  | -0.37 | 8.5          | 0.2  | 8.16  | -0.12 | 7.40  | -0.88 | 7.4          | -0.9 | 6.99  | -1.29 | 7.95  | -0.33 | 7.26         | -1.02 | 7.30  | -0.98 |
| <b>32</b> | 8.45   | -H | A  | 7.92  | -0.53 | 8.7          | 0.3  | 8.19  | -0.26 | 7.53  | -0.92 | 7.6          | -0.9 | 6.98  | -1.47 | 7.99  | -0.46 | 7.83         | -0.62 | 7.08  | -1.37 |
| <b>33</b> | 7.9798 | -H | VR | 7.92  | -0.06 | 8.1          | 0.1  | 8.24  | 0.26  | 7.53  | -0.45 | 7.3          | -0.7 | 6.98  | -1.00 | 7.99  | 0.01  | 7.83         | -0.15 | 7.08  | -0.90 |
| <b>34</b> | 8.14   | -H | A  | 7.93  | -0.21 | 8.4          | 0.3  | 8.29  | 0.15  | 7.67  | -0.47 | 7.5          | -0.6 | 6.98  | -1.16 | 8.03  | -0.11 | 8.01         | -0.13 | 7.08  | -1.06 |
| <b>35</b> | 8.13   | -H | A  | 7.93  | -0.20 | 7.9          | -0.2 | 8.33  | 0.20  | 7.99  | -0.14 | 7.5          | -0.6 | 6.98  | -1.15 | 7.97  | -0.16 | 7.97         | -0.16 | 7.08  | -1.05 |
| <b>36</b> | 7.95   | -H | A  | 7.92  | -0.03 | 7.9          | -0.0 | 8.27  | 0.32  | 7.88  | -0.07 | 6.8          | -1.2 | 6.98  | -0.97 | 7.96  | 0.01  | 7.96         | 0.01  | 7.08  | -0.87 |
| <b>37</b> | 8.14   | -H | A  | 7.93  | -0.21 | 8.0          | -0.1 | 8.41  | 0.27  | 8.01  | -0.13 | 8.1          | 0.0  | 6.98  | -1.16 | 7.96  | -0.18 | 8.37         | 0.23  | 7.30  | -0.84 |
| <b>38</b> | 7.89   | -H | A  | 7.80  | -0.09 | 8.0          | 0.1  | 7.98  | 0.09  | 7.38  | -0.51 | 7.2          | -0.7 | 6.98  | -0.91 | 7.95  | 0.06  | 7.40         | -0.49 | 6.85  | -1.04 |

|           |       |    |    |      |                    |     |      |      |                    |      |       |                  |      |      |                    |      |       |      |                    |      |       |
|-----------|-------|----|----|------|--------------------|-----|------|------|--------------------|------|-------|------------------|------|------|--------------------|------|-------|------|--------------------|------|-------|
| <b>39</b> | 8.01  | -H | A  | 7.81 | -0.20              | 8.1 | 0.1  | 8.06 | 0.05               | 7.52 | -0.49 | 7.2              | -0.8 | 6.98 | -1.03              | 7.99 | -0.02 | 7.99 | -0.02              | 6.85 | -1.16 |
| <b>40</b> | 7.81  | -H | A  | 7.67 | -0.14              | 7.9 | 0.1  | 7.75 | -0.06              | 7.37 | -0.44 | 7.2              | -0.6 | 6.98 | -0.83              | 7.90 | 0.09  | 7.79 | -0.02              | 6.62 | -1.19 |
| <b>41</b> | 8.39  | -H | A  | 7.85 | -0.54              | 8.5 | 0.1  | 7.73 | -0.66              | 7.48 | -0.91 | 7.9              | -0.5 | 6.98 | -1.41              | 7.87 | -0.52 | 6.84 | -1.55              | 7.31 | -1.08 |
| <b>42</b> | 8.06  | -H | A  | 7.86 | -0.20              | 8.0 | -0.1 | 7.88 | -0.18              | 7.48 | -0.58 | 7.9              | -0.2 | 6.98 | -1.08              | 7.91 | -0.15 | 7.40 | -0.66              | 7.31 | -0.75 |
| <b>43</b> | 8.19  | -H | A  | 7.87 | -0.32              | 8.2 | 0.0  | 8.01 | -0.18              | 7.62 | -0.57 | 7.7              | -0.5 | 6.98 | -1.21              | 7.95 | -0.24 | 7.99 | -0.20              | 7.31 | -0.88 |
| <b>44</b> | 8.39  | -H | A  | 7.88 | -0.51              | 7.9 | -0.5 | 8.14 | -0.25              | 7.68 | -0.71 | 8.0              | -0.4 | 6.98 | -1.41              | 8.00 | -0.39 | 8.55 | 0.16               | 7.31 | -1.08 |
| <b>45</b> | 8.13  | -H | A  | 7.80 | -0.33              | 7.9 | -0.2 | 7.61 | -0.52              | 7.56 | -0.57 | 9.0              | 0.9  | 6.98 | -1.15              | 7.83 | -0.3  | 7.79 | -0.34              | 7.53 | -0.60 |
| <b>46</b> | 7.78  | -H | A  | 7.72 | -0.06              | 8.4 | 0.6  | 7.72 | -0.06              | 7.74 | -0.04 | 7.0              | -0.8 | 6.64 | -1.14              | 7.66 | -0.12 | 7.39 | -0.39              | 6.95 | -0.83 |
| <b>47</b> | 7.48  | -H | A  | 7.72 | 0.24               | 7.9 | 0.4  | 7.89 | 0.41               | 7.80 | 0.32  | 7.0              | -0.5 | 6.64 | -0.84              | 7.71 | 0.23  | 7.96 | 0.48               | 6.95 | -0.53 |
| <b>48</b> | 7.78  | -H | A  | 7.58 | -0.20              | 7.7 | -0.1 | 7.07 | -0.71              | 6.51 | -1.27 | 7.0              | -0.8 | 6.64 | -1.14              | 7.56 | -0.22 | 7.73 | -0.05              | 6.87 | -0.91 |
| <b>49</b> | 7.48  | -H | A  | 7.58 | 0.10               | 8.0 | 0.5  | 7.22 | -0.26              | 6.64 | -0.84 | 6.8              | -0.7 | 6.64 | -0.84              | 7.61 | 0.13  | 7.30 | -0.18              | 6.87 | -0.61 |
| <b>50</b> | 7.015 | -H | A  | 7.37 | 0.36               | 7.5 | 0.5  | 5.79 | -1.23              | 6.64 | -0.38 | 6.2              | -0.8 | 6.64 | -0.38              | 7.40 | 0.39  | 7.30 | 0.29               | 6.35 | -0.67 |
| <b>51</b> | 6.94  | -H | A  | 7.29 | 0.35               | 7.5 | 0.6  | 5.70 | -1.24              | 6.64 | -0.3  | 6.2              | -0.7 | 6.64 | -0.30              | 7.38 | 0.44  | 7.30 | 0.36               | 6.30 | -0.64 |
| <b>52</b> | 7.3   | -H | A  | 7.23 | -0.07              | 8.8 | 1.5  | 6.18 | -1.12              | 6.44 | -0.86 | 6.7              | -0.6 | 6.29 | -1.01              | 7.23 | -0.07 | 2.34 | -4.96              | 6.94 | -0.36 |
| <b>53</b> | 8.73  | -H | A  | 9.31 | 0.58               | 8.9 | 0.2  | 7.69 | -1.04              | 7.40 | -1.33 | 7.6              | -1.1 | 6.98 | -1.75              | 7.90 | -0.83 | 6.73 | -2.00              | 7.30 | -1.43 |
| <b>54</b> | 8.82  | -H | A  | 9.30 | 0.48               | 8.9 | 0.1  | 7.84 | -0.98              | 7.27 | -1.55 | 7.9              | -0.9 | 6.98 | -1.84              | 7.90 | -0.92 | 6.73 | -2.09              | 7.30 | -1.52 |
| <b>55</b> | 8.83  | -H | A  | 9.30 | 0.47               | 9.0 | 0.2  | 8.04 | -0.79              | 7.47 | -1.36 | 7.8              | -1.0 | 6.98 | -1.85              | 7.90 | -0.93 | 8.88 | 0.05               | 7.30 | -1.53 |
| <b>56</b> | 8.88  | -H | A  | 9.31 | 0.43               | 9.0 | 0.1  | 8.05 | -0.83              | 7.39 | -1.49 | 8.0              | -0.9 | 6.98 | -1.9               | 8.00 | -0.88 | 8.88 | 0.00               | 7.30 | -1.58 |
| <b>57</b> | 2.515 | +H | A  | 2.51 | -0.01              | 2.6 | 0.1  | 2.67 | 0.16               | 2.03 | -0.49 | 2.7              | 0.2  | 2.78 | 0.27               | 2.51 | -0.01 | 3.46 | 0.95               | 2.39 | -0.13 |
| <b>58</b> | 4.207 | -H | R  | 4.20 | -0.01              | 3.9 | 0.3  | 4.05 | -0.16              | 4.20 | -0.01 | 3.4              | -0.8 | 4.08 | -0.13              | 4.20 | -0.01 | 3.53 | -0.68              | 4.02 | -0.19 |
| <b>59</b> | 8.7   | +H | A  | 8.97 | 0.27               | 8.5 | -0.2 | 7.88 | -0.82              | 7.81 | -0.89 | 6.9              | -1.8 | 7.65 | -1.05              | 7.29 | -1.41 | 8.65 | -0.05              | 7.56 | -1.14 |
| <b>60</b> | 9.234 | -H | VR | 8.91 | -0.32 <sup>b</sup> | -   | -    | 1.37 | -7.86 <sup>b</sup> | -    | -     | <sup>b</sup>     | -    | 8.70 | -0.53 <sup>b</sup> | -    | -     | 8.97 | -0.26 <sup>b</sup> | -    | -     |
| <b>61</b> | 8.28  | +H | A  | 8.31 | 0.03               | 8.1 | -0.2 | 7.34 | -0.94              | 9.81 | 1.53  | 9.9              | 1.6  | 7.95 | -0.33              | 7.65 | -0.63 | 5.13 | -3.15              | 9.04 | 0.76  |
| <b>62</b> | 6.352 | -H | R  | 4.36 | -1.99              | 2.9 | -3.5 | 1.59 | -4.76              | 2.66 | -3.69 | 4.4 <sup>c</sup> | -2.0 | 6.05 | -0.30              | 2.19 | -4.16 | 3.43 | -2.92              | 3.24 | -3.11 |

|           |       |    |   |       |       |      |      |       |       |              |       |              |      |       |       |       |       |      |       |              |       |
|-----------|-------|----|---|-------|-------|------|------|-------|-------|--------------|-------|--------------|------|-------|-------|-------|-------|------|-------|--------------|-------|
|           | 10.39 | -H | R | 10.30 | -0.09 | 8.9  | -1.5 | 8.25  | -2.14 | 6.59         | -3.80 | 1.6          | -8.8 | 10.64 | 0.25  | 9.46  | -0.93 | 6.37 | -4.02 | <sup>b</sup> | -     |
| <b>63</b> | 5.03  | -H | A | 4.76  | -0.27 | 5.4  | 0.4  | 5.15  | 0.12  | 5.12         | 0.09  | 7.2          | 2.2  | 4.60  | -0.43 | 4.82  | -0.21 | 5.70 | 0.67  | 4.74         | -0.29 |
| <b>64</b> | 5.04  | -H | A | 4.76  | -0.28 | 5.4  | 0.4  | 5.15  | 0.11  | 5.13         | 0.09  | 7.0          | 2.0  | 4.60  | -0.44 | 4.82  | -0.22 | 5.70 | 0.66  | 4.74         | -0.30 |
| <b>65</b> | 2.12  | +H | A | 2.24  | 0.12  | 2.7  | 0.6  | 2.55  | 0.43  | 2.70         | 0.58  | 2.3          | 0.2  | 2.17  | 0.05  | -1.76 | -3.88 | 2.04 | -0.08 | 3.32         | 1.20  |
|           | 7.65  | +H | A | 7.47  | -0.18 | 8.1  | 0.4  | 8.28  | 0.63  | 7.50         | -0.15 | 9.2          | 1.6  | 8.00  | 0.35  | 5.89  | -1.76 | 8.30 | 0.65  | 8.31         | 0.66  |
| <b>66</b> | 2.16  | +H | A | 2.47  | 0.31  | 2.8  | 0.6  | 2.74  | 0.58  | 2.70         | 0.54  | 2.8          | 0.6  | 2.81  | 0.65  | -1.76 | -3.92 | 2.50 | 0.34  | 3.64         | 1.48  |
|           | 8.05  | +H | A | 7.50  | -0.55 | 8.2  | 0.1  | 8.42  | 0.37  | 7.51         | -0.54 | 9.3          | 1.3  | 8.51  | 0.46  | 7.20  | -0.85 | 8.30 | 0.25  | 8.39         | 0.34  |
| <b>67</b> | 5.32  | +H | A | 8.06  | 2.74  | 5.5  | 0.2  | 7.61  | 2.29  | 9.22         | 3.90  | <sup>d</sup> | -    | 6.64  | 1.32  | 5.68  | 0.36  | 4.77 | -0.55 | 6.33         | 1.01  |
| <b>68</b> | 5.29  | +H | A | 8.05  | 2.76  | 5.5  | 0.2  | 7.63  | 2.34  | 9.21         | 3.92  | <sup>d</sup> | -    | 6.89  | 1.60  | 5.65  | 0.36  | 4.77 | -0.52 | 6.36         | 1.07  |
| <b>69</b> | 5.3   | +H | A | 8.07  | 2.77  | 5.6  | 0.3  | 7.71  | 2.41  | 9.22         | 3.92  | <sup>d</sup> | -    | 6.89  | 1.59  | 5.65  | 0.35  | 4.77 | -0.53 | 6.40         | 1.10  |
| <b>70</b> | 10.95 | +H | A | 11.19 | 0.24  | 11.0 | 0.1  | 10.51 | -0.44 | 8.31         | -2.64 | 10.6         | -0.4 | 7.07  | -3.88 | 13.69 | 2.74  | 9.77 | -1.18 | 9.52         | -1.43 |
| <b>71</b> | 11.01 | +H | A | 11.19 | 0.18  | 11.1 | 0.1  | 10.85 | -0.16 | 8.58         | -2.43 | 10.3         | -0.7 | 7.10  | -3.91 | 12.53 | 1.52  | 9.77 | -1.24 | 9.52         | -1.49 |
| <b>72</b> | 11.02 | +H | A | 11.17 | 0.15  | 11.1 | 0.1  | 10.88 | -0.14 | 8.63         | -2.39 | 10.3         | -0.7 | 7.15  | -3.87 | 12.58 | 1.56  | 9.77 | -1.25 | 9.52         | -1.50 |
| <b>73</b> | 10.83 | +H | A | 11.20 | 0.37  | 11.1 | 0.3  | 11.07 | 0.24  | 8.97         | -1.86 | 10.3         | -0.5 | 7.17  | -3.66 | 12.02 | 1.19  | 9.77 | -1.06 | 9.52         | -1.30 |
| <b>74</b> | 3.285 | -H | A | 4.5   | 1.22  | 3.3  | 0.0  | 6.70  | 3.42  | 4.61         | 1.33  | <sup>d</sup> | -    | 4.12  | 0.84  | 8.87  | 5.59  | 3.05 | -0.24 | <sup>b</sup> | -     |
|           | 7.435 | +H | A | 11.01 | 3.58  | 9.3  | 1.9  | 3.15  | -4.29 | 10.42        | 2.99  | <sup>d</sup> | -    | 8.36  | 0.93  | 8.92  | 1.49  | 9.48 | 2.05  | <sup>b</sup> | -     |
|           | 9.3   | -H | A | 8.03  | -1.27 | 11.4 | 2.1  | 8.53  | -0.77 | 7.55         | -1.75 | <sup>d</sup> | -    | 10.97 | 1.67  | 7.56  | -1.74 | 7.33 | -1.97 | <sup>b</sup> | -     |
| <b>75</b> | 3.27  | -H | A | 4.5   | 1.23  | 3.2  | -0.1 | 7.67  | 4.40  | <sup>g</sup> | -     | <sup>d</sup> | -    | 4.31  | 1.04  | 10.70 | 7.43  | 3.50 | 0.23  | <sup>b</sup> | -     |
|           | 7.32  | +H | A | 10.80 | 3.48  | 9.0  | 1.7  | 3.80  | -3.52 | 8.39         | 1.07  | <sup>d</sup> | -    | 7.87  | 0.55  | 6.52  | -0.80 | 9.25 | 1.93  | <sup>b</sup> | -     |
|           | 9.11  | -H | A | 8.48  | -0.63 | 12.5 | 3.4  | 8.87  | -0.24 | 7.43         | -1.68 | <sup>d</sup> | -    | 11.43 | 2.32  | 8.04  | -1.07 | 7.79 | -1.32 | <sup>b</sup> | -     |
| <b>76</b> | 3.3   | -H | A | 4.50  | 1.20  | 3.3  | 0.0  | 7.46  | 4.16  | 4.62         | 1.32  | <sup>d</sup> | -    | 4.41  | 1.11  | 8.87  | 5.57  | 3.05 | -0.25 | <sup>b</sup> | -     |
|           | 7.68  | +H | A | 11.02 | 3.34  | 9.4  | 1.7  | 3.32  | -4.36 | 10.43        | 2.75  | <sup>d</sup> | -    | 8.36  | 0.68  | 8.92  | 1.24  | 9.48 | 1.80  | <sup>b</sup> | -     |
|           | 9.69  | -H | A | 8.50  | -1.19 | 12.0 | 2.3  | 8.90  | -0.79 | 8.49         | -1.20 | <sup>d</sup> | -    | 11.44 | 1.75  | 8.06  | -1.63 | 7.81 | -1.88 | <sup>b</sup> | -     |
| <b>77</b> | 4.45  | -H | A | 4.34  | -0.11 | 4.7  | 0.3  | 4.46  | 0.01  | 4.45         | 0.00  | 4.5          | 0.0  | 4.51  | 0.06  | 4.45  | 0.00  | 4.16 | -0.29 | 4.10         | -0.35 |

|           |       |    |    |       |       |              |      |       |       |       |       |              |      |       |       |       |       |       |       |              |       |
|-----------|-------|----|----|-------|-------|--------------|------|-------|-------|-------|-------|--------------|------|-------|-------|-------|-------|-------|-------|--------------|-------|
| <b>78</b> | 9.355 | -H | A  | 9.57  | 0.22  | 9.0          | -0.4 | 8.49  | -0.87 | 9.46  | 0.11  | 9.3          | -0.1 | 9.20  | -0.16 | 9.29  | -0.07 | 9.40  | 0.04  | 8.70         | -0.66 |
| <b>79</b> | 3.128 | -H | VR | 2.93  | -0.20 | 2.8          | -0.3 | 2.97  | -0.16 | 3.48  | 0.35  | <sup>d</sup> | -    | 3.05  | -0.08 | 2.84  | -0.29 | 2.25  | -0.88 | 2.84         | -0.29 |
|           | 4.761 | -H | VR | 4.23  | -0.53 | 4.2          | -0.6 | 4.40  | -0.36 | 5.28  | 0.52  | <sup>d</sup> | -    | 4.67  | -0.09 | 4.01  | -0.75 | 6.50  | 1.74  | 4.41         | -0.35 |
|           | 6.396 | -H | VR | 5.09  | -1.31 | 5.4          | -1.0 | 6.20  | -0.20 | 6.20  | -0.20 | <sup>d</sup> | -    | 5.39  | -1.01 | 4.90  | -1.50 | 8.51  | 2.11  | 5.19         | -1.21 |
| <b>80</b> | 7.72  | +H | A  | 8.74  | 1.02  | 7.6          | -0.1 | 7.15  | -0.57 | 9.25  | 1.53  | 9.4          | 1.7  | 7.55  | -0.17 | 7.96  | 0.24  | 7.66  | -0.06 | 7.96         | 0.24  |
| <b>81</b> | 8.16  | -H | A  | 7.23  | -0.93 | 7.9          | -0.3 | 7.91  | -0.25 | 6.15  | -2.01 | 8.3          | 0.1  | 7.34  | -0.82 | 3.83  | -4.33 | 7.90  | -0.26 | 7.80         | -0.36 |
| <b>82</b> | 8.12  | +H | A  | 8.02  | -0.10 | 7.9          | -0.2 | 7.94  | -0.18 | 7.12  | -1.00 | 9.9          | 1.8  | 9.34  | 1.22  | 8.37  | 0.25  | 8.05  | -0.07 | 10.20        | 2.08  |
| <b>83</b> | 9.7   | +H | A  | 9.84  | 0.14  | 9.7          | 0.0  | 9.66  | -0.04 | 10.19 | 0.49  | 11.3         | 1.6  | 9.64  | -0.06 | 9.95  | 0.25  | 9.52  | -0.18 | 9.89         | 0.19  |
| <b>84</b> | 8.39  | +H | A  | 8.50  | 0.11  | 8.6          | 0.2  | 8.60  | 0.21  | 8.46  | 0.07  | 9.6          | 1.2  | 8.80  | 0.41  | 8.36  | -0.03 | 8.66  | 0.27  | 8.51         | 0.12  |
| <b>85</b> | 3.443 | +H | A  | 3.40  | -0.04 | 4.2          | 0.8  | 3.43  | -0.01 | 4.62  | 1.18  | 3.1          | -0.3 | 2.92  | -0.52 | 3.66  | 0.22  | 4.78  | 1.34  | 3.83         | 0.39  |
|           | 6.14  | +H | A  | 7.03  | 0.89  | 8.2          | 2.1  | 8.04  | 1.90  | 7.84  | 1.70  | 8.2          | 2.1  | 8.43  | 2.29  | 7.78  | 1.64  | 7.17  | 1.03  | 8.29         | 2.15  |
| <b>86</b> | 8.22  | +H | A  | 8.23  | 0.01  | 8.4          | 0.2  | 8.29  | 0.07  | 9.42  | 1.20  | 9.0          | 0.8  | 9.19  | 0.97  | 8.80  | 0.58  | 8.10  | -0.12 | 9.67         | 1.45  |
| <b>87</b> | 9.23  | +H | A  | 9.28  | 0.05  | 8.8          | -0.4 | 8.79  | -0.44 | 9.93  | 0.70  | 9.1          | -0.1 | 10.07 | 0.84  | 9.12  | -0.11 | 9.23  | 0.00  | 10.54        | 1.31  |
| <b>88</b> | 5.68  | +H | A  | 6.65  | 0.97  | 5.6          | -0.1 | 5.99  | 0.31  | 7.73  | 2.05  | 6.4          | 0.7  | 7.18  | 1.50  | 5.69  | 0.01  | 5.68  | 0.00  | 7.14         | 1.46  |
| <b>89</b> | 3.6   | -H | A  | 3.56  | -0.04 | 3.7          | 0.1  | 3.61  | 0.01  | 3.37  | -0.23 | 6.9          | 3.3  | 4.09  | 0.49  | 3.56  | -0.04 | 3.58  | -0.02 | 3.42         | -0.18 |
| <b>90</b> | 3.56  | -H | A  | 3.39  | -0.17 | 3.7          | 0.1  | 3.79  | 0.23  | 3.38  | -0.18 | 7.8          | 4.2  | 4.27  | 0.71  | 3.60  | 0.04  | 3.58  | 0.02  | 3.42         | -0.14 |
| <b>91</b> | 3.6   | -H | A  | 3.39  | -0.21 | 3.8          | 0.2  | 4.04  | 0.44  | 3.39  | -0.21 | 9.3          | 5.7  | 4.22  | 0.62  | 3.60  | 0.00  | 3.58  | -0.02 | 3.42         | -0.18 |
| <b>92</b> | 3.65  | -H | A  | 3.39  | -0.26 | 3.8          | 0.2  | 4.13  | 0.48  | 3.39  | -0.26 | 8.0          | 4.4  | 4.22  | 0.57  | 3.60  | -0.05 | 3.58  | -0.07 | 3.42         | -0.23 |
| <b>93</b> | 3.451 | +H | A  | -0.60 | -4.05 | <sup>b</sup> | -    | 1.04  | -2.41 | 0.06  | -3.39 | <sup>b</sup> | -    | -6.43 | -9.88 | -1.12 | -4.57 | 3.20  | -0.25 | <sup>b</sup> | -     |
|           | 8.275 | +H | A  | 8.78  | 0.50  | 8.2          | -0.1 | 8.10  | -0.18 | 8.48  | 0.21  | 7.9          | -0.4 | 8.23  | -0.04 | 8.47  | 0.20  | 7.04  | -1.24 | 8.90         | 0.63  |
| <b>94</b> | 3.99  | -H | A  | 4.18  | 0.19  | 4.2          | 0.2  | 3.83  | -0.16 | 4.40  | 0.41  | 4.6          | 0.6  | 4.00  | 0.01  | 4.46  | 0.47  | 3.80  | -0.19 | 4.12         | 0.13  |
| <b>95</b> | 8.75  | +H | A  | 8.43  | -0.32 | 8.5          | -0.3 | 8.57  | -0.18 | 9.92  | 1.17  | 9.3          | 0.6  | 9.33  | 0.58  | 8.80  | 0.05  | 8.35  | -0.40 | 9.69         | 0.94  |
| <b>96</b> | 9.35  | +H | A  | 8.44  | -0.91 | 8.3          | -1.1 | 8.47  | -0.88 | 9.88  | 0.53  | <sup>d</sup> | -    | 9.24  | -0.11 | 8.90  | -0.45 | 8.79  | -0.56 | 9.44         | 0.09  |
| <b>97</b> | 10.29 | -H | A  | 10.15 | -0.14 | 10.5         | 0.2  | 10.24 | -0.05 | 11.01 | 0.72  | 10.8         | 0.5  | 9.41  | -0.88 | 10.28 | -0.01 | 11.12 | 0.83  | 10.40        | 0.11  |

|            |       |    |   |       |       |      |      |       |       |              |       |              |      |       |       |       |       |       |       |              |       |
|------------|-------|----|---|-------|-------|------|------|-------|-------|--------------|-------|--------------|------|-------|-------|-------|-------|-------|-------|--------------|-------|
| <b>98</b>  | 9.77  | -H | A | 10.15 | 0.38  | 10.5 | 0.7  | 10.24 | 0.47  | 11.01        | 1.24  | 10.7         | 0.9  | 9.41  | -0.36 | 10.28 | 0.51  | 11.12 | 1.35  | 10.40        | 0.63  |
| <b>99</b>  | 7.55  | +H | A | 8.02  | 0.47  | 9.1  | 1.6  | 9.15  | 1.60  | 9.77         | 2.22  | <sup>d</sup> |      | 9.25  | 1.70  | 9.03  | 1.48  | 10.12 | 2.57  | 9.78         | 2.23  |
| <b>100</b> | 3.2   | -H | A | 3.41  | 0.21  | 3.1  | -0.1 | 3.45  | 0.25  | 3.60         | 0.40  | 6.1          | 2.9  | 3.28  | 0.08  | 3.44  | 0.24  | 3.20  | 0.00  | 3.29         | 0.09  |
|            | 7.18  | +H | A | 7.43  | 0.25  | 7.4  | 0.2  | 7.74  | 0.56  | 8.29         | 1.11  | 7.8          | 0.6  | 8.01  | 0.83  | 7.70  | 0.52  | 7.11  | -0.07 | 7.54         | 0.36  |
| <b>101</b> | 3.37  | -H | A | 3.49  | 0.12  | 3.1  | -0.3 | 3.91  | 0.54  | 3.72         | 0.35  | 6.3          | 2.9  | 3.16  | -0.21 | 3.44  | 0.07  | 3.37  | 0.00  | 3.54         | 0.17  |
|            | 7.04  | +H | A | 6.91  | -0.13 | 7.3  | 0.3  | 7.52  | 0.48  | 8.09         | 1.05  | 7.3          | 0.3  | 7.71  | 0.67  | 7.70  | 0.66  | 7.11  | 0.07  | 7.00         | -0.04 |
| <b>102</b> | 5.24  | -H | A | 1.85  | -3.39 | 8.3  | 3.1  | 6.71  | 1.47  | <sup>g</sup> | -     | <sup>d</sup> | -    | 8.22  | 2.98  | 9.54  | 4.30  | 8.78  | 3.54  | 5.25         | 0.01  |
| <b>103</b> | 2.975 | -H | A | 3.15  | 0.18  | 3.0  | 0.0  | 3.24  | 0.27  | 2.89         | -0.09 | <sup>d</sup> | -    | 3.18  | 0.21  | 1.80  | -1.18 | 2.94  | -0.04 | 3.82         | 0.85  |
|            | 5.36  | +H | A | 5.43  | 0.07  | 5.5  | 0.1  | 5.97  | 0.61  | 7.37         | 2.01  | <sup>d</sup> | -    | 5.19  | -0.17 | 1.39  | -3.97 | 5.50  | 0.14  | 5.55         | 0.19  |
| <b>104</b> | 3.68  | -H | A | 3.23  | -0.45 | 3.1  | -0.6 | 3.95  | 0.27  | 3.41         | -0.27 | 6.6          | 2.9  | 3.11  | -0.57 | 3.50  | -0.18 | 3.21  | -0.47 | 3.77         | 0.09  |
|            | 7.77  | +H | A | 7.21  | -0.56 | 7.4  | -0.4 | 7.69  | -0.08 | 8.14         | 0.37  | <sup>d</sup> | -    | 7.73  | -0.04 | 7.43  | -0.34 | 7.69  | -0.08 | 7.34         | -0.43 |
|            | 9.89  | -H | A | 9.97  | 0.08  | 9.8  | -0.1 | 9.94  | 0.05  | 10.15        | 0.26  | <sup>d</sup> | -    | 9.51  | -0.38 | 9.71  | -0.18 | 8.53  | -1.36 | 10.00        | 0.11  |
| <b>105</b> | 9.61  | +H | A | 9.38  | -0.23 | 9.3  | -0.3 | 9.43  | -0.18 | 8.64         | -0.97 | 9.5          | -0.1 | 9.52  | -0.09 | 9.86  | 0.25  | 9.50  | -0.11 | 9.70         | 0.09  |
| <b>106</b> | 10.71 | -H | A | 10.27 | -0.44 | 10.5 | -0.2 | 10.41 | -0.30 | 11.42        | 0.71  | 10.9         | 0.2  | 10.33 | -0.38 | 10.37 | -0.34 | 13.18 | 2.47  | 10.54        | -0.17 |
| <b>107</b> | 10.34 | -H | A | 10.25 | -0.09 | 10.4 | 0.1  | 10.30 | -0.04 | 11.19        | 0.85  | 10.7         | 0.4  | 10.33 | -0.01 | 10.37 | 0.03  | 13.18 | 2.84  | 10.48        | 0.14  |
| <b>108</b> | 10.4  | -H | A | 10.24 | -0.16 | 10.4 | 0.0  | 10.41 | 0.01  | 11.41        | 1.01  | 10.8         | 0.4  | 10.33 | -0.07 | 10.37 | -0.03 | 13.18 | 2.78  | 10.51        | 0.11  |
| <b>109</b> | 6.38  | -H | A | 5.70  | -0.68 | 6.1  | -0.3 | 4.99  | -1.39 | 3.53         | -2.85 | 4.0          | -2.4 | 6.00  | -0.38 | 6.25  | -0.13 | 6.67  | 0.29  | 5.58         | -0.80 |
| <b>110</b> | 3.65  | -H | A | 3.04  | -0.61 | 3.5  | -0.2 | 3.79  | 0.14  | 4.59         | 0.94  | 3.7          | 0.1  | 4.25  | 0.60  | 4.06  | 0.41  | 3.90  | 0.25  | 3.20         | -0.45 |
|            | 10.4  | -H | A | 9.79  | -0.61 | 8.7  | -1.7 | 9.48  | -0.92 | 10.18        | -0.22 | 8.4          | -2.0 | 9.91  | -0.49 | 9.84  | -0.56 | 11.57 | 1.17  | <sup>b</sup> | -     |
| <b>111</b> | 4.21  | -H | A | 4.33  | 0.12  | 4.3  | 0.1  | 3.25  | -0.96 | 4.40         | 0.19  | 3.7          | -0.5 | 3.94  | -0.27 | 4.32  | 0.11  | 4.33  | 0.12  | 3.99         | -0.22 |
| <b>112</b> | 3.62  | -H | A | 3.35  | -0.27 | 3.7  | 0.1  | 4.26  | 0.64  | 3.41         | -0.21 | 2.9          | -0.7 | 3.39  | -0.23 | 3.20  | -0.42 | 4.43  | 0.81  | 3.07         | -0.55 |
| <b>113</b> | 6.1   | -H | A | 6.36  | 0.26  | 6.1  | 0.0  | 6.82  | 0.72  | 6.27         | 0.17  | <sup>b</sup> | -    | 6.24  | 0.14  | 6.13  | 0.03  | 4.55  | -1.55 | 6.52         | 0.42  |
|            | 8.14  | +H | A | 8.42  | 0.28  | 7.5  | -0.6 | 7.96  | -0.18 | 7.68         | -0.46 | <sup>d</sup> | -    | 8.23  | 0.09  | 7.69  | -0.45 | 8.23  | 0.09  | 7.74         | -0.40 |
| <b>114</b> | 11.4  | +H | A | 11.24 | -0.16 | 10.6 | -0.8 | 10.20 | -1.20 | 10.16        | -1.24 | 11.5         | 0.1  | 10.25 | -1.15 | 11.28 | -0.12 | 11.40 | 0.00  | 10.10        | -1.30 |

|            |                    |    |   |       |       |              |      |       |       |       |       |                  |      |       |       |       |       |              |       |              |       |
|------------|--------------------|----|---|-------|-------|--------------|------|-------|-------|-------|-------|------------------|------|-------|-------|-------|-------|--------------|-------|--------------|-------|
| <b>115</b> | 10.55              | +H | A | 10.55 | 0.00  | 10.4         | -0.2 | 9.06  | -1.49 | 9.96  | -0.59 | 10.9             | 0.4  | 8.46  | -2.09 | 11.28 | 0.73  | 10.55        | 0.00  | 9.81         | -0.74 |
| <b>116</b> | 4.52               | +H | A | 4.93  | 0.41  | 5.4          | 0.9  | 5.36  | 0.84  | 5.88  | 1.36  | 7.5              | 3.0  | 5.67  | 1.15  | 5.55  | 1.03  | 5.08         | 0.56  | 5.78         | 1.26  |
|            | 8.47               | +H | A | 8.21  | -0.26 | 8.5          | 0.0  | 8.81  | 0.34  | 8.88  | 0.41  | 7.0 <sup>f</sup> | -1.5 | 9.66  | 1.19  | 8.56  | 0.09  | 8.71         | 0.24  | 8.70         | 0.23  |
| <b>117</b> | 5.784              | +H | R | 5.45  | -0.33 | 6.0          | 0.2  | 5.85  | 0.07  | 5.40  | -0.38 | 7.2              | 1.4  | 6.24  | 0.46  | 6.14  | 0.36  | 6.04         | 0.26  | 5.30         | -0.48 |
|            | 9.756              | +H | R | 9.26  | -0.50 | 9.7          | -0.1 | 9.54  | -0.22 | 10.21 | 0.45  | 9.0              | -0.8 | 9.58  | -0.18 | 8.77  | -0.99 | 9.77         | 0.01  | 10.40        | 0.64  |
| <b>118</b> | 4.06               | +H | A | 3.21  | -0.85 | 4.1          | 0.0  | 4.84  | 0.78  | 4.69  | 0.63  | 4.2              | 0.1  | 5.28  | 1.22  | 4.23  | 0.17  | 4.64         | 0.58  | 3.33         | -0.73 |
|            | 9.2                | +H | A | 8.94  | -0.26 | 8.9          | -0.3 | 9.69  | 0.49  | 10.21 | 1.01  | 9.2              | 0.0  | 9.51  | 0.31  | 8.16  | -1.04 | 9.77         | 0.57  | 9.96         | 0.76  |
|            | 11.88              | -H | A | 11.98 | 0.10  | <sup>b</sup> | -    | 12.12 | 0.24  | 12.89 | 1.01  | <sup>b</sup>     | -    | 12.48 | 0.60  | 12.12 | 0.24  | <sup>b</sup> | -     | 11.73        | -0.15 |
| <b>119</b> | 2.31               | +H | A | 1.07  | -1.24 | 1.6          | -0.7 | 1.75  | -0.56 | 4.22  | 1.91  | 2.0              | -0.3 | 3.19  | 0.88  | 2.14  | -0.17 | 4.10         | 1.79  | <sup>b</sup> | -     |
|            | 8.2                | +H | A | 8.20  | 0.00  | 8.6          | 0.4  | 8.97  | 0.77  | 10.18 | 1.98  | <sup>d</sup>     | -    | 9.44  | 1.24  | 7.55  | -0.65 | 9.52         | 1.32  | 8.47         | 0.27  |
|            | 10.11              | -H | A | 9.55  | -0.56 | <sup>b</sup> | -    | 10.56 | 0.45  | 9.45  | -0.66 | <sup>d</sup>     | -    | 10.41 | 0.30  | 8.90  | -1.21 | <sup>b</sup> | -     | 11.08        | 0.97  |
| <b>120</b> | 1.975              | +H | A | 2.10  | 0.13  | 2.7          | 0.7  | 2.61  | 0.64  | 2.69  | 0.72  | <sup>d</sup>     | -    | 2.09  | 0.12  | 1.79  | -0.19 | 5.84         | 3.87  | 2.93         | 0.96  |
| <b>121</b> | 8.78               | -H | A | 8.95  | 0.17  | 8.7          | -0.1 | 9.60  | 0.82  | 8.42  | -0.36 | <sup>d</sup>     | -    | 9.96  | 1.18  | 8.70  | -0.08 | 10.04        | 1.26  | 10.41        | 1.63  |
|            | 10.13              | -H | U | 9.57  | -0.56 | 9.9          | -0.2 | 8.35  | -1.78 | 9.90  | -0.23 | <sup>d</sup>     | -    | 9.24  | -0.89 | 9.03  | -1.10 | 9.39         | -0.74 | 9.52         | -0.61 |
| <b>122</b> | 4.44               | -H | A | 4.41  | -0.03 | 4.6          | 0.2  | 4.53  | 0.09  | 4.36  | -0.08 | 4.8              | 0.4  | 4.85  | 0.41  | 4.08  | -0.36 | 4.55         | 0.11  | 4.53         | 0.09  |
| <b>123</b> | 8.65               | +H | A | 9.26  | 0.61  | 8.5          | -0.2 | 8.72  | 0.07  | 8.82  | 0.17  | <sup>d</sup>     | -    | 8.96  | 0.31  | 10.85 | 2.20  | 9.67         | 1.02  | 8.52         | -0.13 |
|            | 10.07              | -H | A | 9.60  | -0.47 | 9.5          | -0.6 | 9.81  | -1.30 | 9.75  | -0.32 | <sup>d</sup>     | -    | 9.81  | -0.26 | 9.38  | -0.69 | 10.01        | -0.06 | 10.49        | 0.42  |
| <b>124</b> | 3.861 <sup>h</sup> | -H | R | 3.91  | 0.05  | 3.7          | -0.2 | 3.89  | 0.03  | 3.54  | -0.32 | 3.5              | -0.4 | 3.78  | -0.08 | 3.70  | -0.16 | 3.86         | 0.00  | 3.86         | -0.00 |
| <b>125</b> | 3.861 <sup>h</sup> | -H | R | 3.91  | 0.05  | 3.7          | -0.2 | 3.89  | 0.03  | 3.54  | -0.32 | 3.5              | -0.4 | 3.78  | -0.08 | 3.70  | -0.16 | 3.86         | 0.00  | 3.86         | -0.00 |
| <b>126</b> | 7.928              | +H | A | 7.96  | 0.03  | 7.9          | -0.0 | 7.62  | -0.31 | 8.63  | 0.70  | 8.4              | 0.5  | 7.75  | -0.18 | 8.63  | 0.70  | 7.89         | -0.04 | 8.21         | 0.28  |
| <b>127</b> | 3.459              | -H | A | 3.61  | 0.15  | 3.5          | 0.0  | 3.41  | -0.05 | 4.14  | 0.68  | <sup>d</sup>     | -    | 3.20  | -0.26 | 3.08  | -0.38 | 3.52         | 0.06  | 3.32         | -0.14 |
|            | 5.097              | -H | A | 4.82  | -0.28 | 5.0          | -0.1 | 5.22  | 0.12  | 5.88  | 0.78  | <sup>d</sup>     | -    | 5.13  | 0.03  | 4.59  | -0.51 | 5.02         | -0.08 | 5.12         | 0.02  |
| <b>128</b> | 1.93               | -H | A | 2.39  | 0.46  | 2.2          | 0.3  | 2.94  | 1.01  | 2.71  | 0.78  | 1.5 <sup>e</sup> | -0.4 | 3.05  | 1.12  | 4.09  | 2.16  | 2.52         | 0.59  | 3.17         | 1.24  |
|            | 6.225              | -H | A | 5.34  | -0.89 | 4.0          | -2.2 | 4.81  | -1.42 | 4.46  | -1.77 | 5.2              | -1.0 | 5.91  | -0.32 | 5.32  | -0.90 | 5.41         | -0.82 | 4.22         | -2.01 |



|            |                   |    |   |       |       |      |      |       |       |              |       |                  |      |       |       |       |       |       |       |                   |       |
|------------|-------------------|----|---|-------|-------|------|------|-------|-------|--------------|-------|------------------|------|-------|-------|-------|-------|-------|-------|-------------------|-------|
| <b>129</b> | 7.41              | -H | A | 8.21  | 0.80  | 7.7  | 0.3  | 9.28  | 1.87  | 8.20         | 0.79  | <sup>d</sup>     | -    | 8.05  | 0.64  | 8.04  | 0.63  | 8.54  | 1.13  | 9.98              | 2.57  |
|            | 9.36              | +H | A | 9.30  | -0.06 | 9.1  | -0.3 | 8.06  | -0.08 | 9.32         | -0.04 | <sup>d</sup>     | -    | 9.80  | 0.44  | 10.05 | 0.69  | 8.60  | -0.76 | 8.87              | -0.49 |
| <b>130</b> | 2.85              | -H | A | 2.92  | 0.07  | 2.8  | -0.1 | 3.02  | 0.17  | 3.60         | 0.75  | 2.9 <sup>e</sup> | 0.0  | 2.43  | -0.42 | 2.77  | -0.08 | 4.12  | 1.27  | 2.66              | -0.19 |
|            | 5.66              | -H | A | 5.61  | -0.05 | 5.0  | -0.7 | 5.00  | -0.66 | 6.93         | 1.27  | 4.9              | -0.8 | 5.92  | 0.26  | 5.38  | -0.28 | 5.69  | 0.03  | 5.26              | -0.40 |
| <b>131</b> | 10.37             | +H | A | 10.38 | 0.01  | 10.3 | -0.1 | 10.28 | -0.09 | 9.70         | -0.67 | 10.3             | -0.1 | 10.30 | -0.07 | 10.16 | -0.21 | 10.17 | -0.20 | 10.23             | -0.14 |
| <b>132</b> | 9.99              | +H | A | 10.38 | 0.39  | 10.1 | 0.1  | 10.18 | 0.19  | 9.70         | -0.29 | 9.8              | -0.2 | 10.21 | 0.22  | 10.16 | 0.17  | 10.25 | 0.26  | 10.28             | 0.29  |
| <b>133</b> | 9.62              | +H | A | 9.82  | 0.2   | 9.3  | -0.3 | 10.56 | 0.94  | 9.70         | 0.08  | <sup>d</sup>     | -    | 10.58 | 0.96  | 10.74 | 1.12  | 10.25 | 0.63  | 9.63              | 0.01  |
| <b>134</b> | 7.77 <sup>i</sup> | -H | A | 8.71  | 0.94  | 7.6  | -0.2 | 10.10 | 2.33  | <sup>b</sup> | -     | 3.0              | -4.8 | 7.51  | -0.26 | 10.43 | 2.66  | 4.64  | -3.13 | 7.10 <sup>j</sup> | -0.67 |
| <b>135</b> | 9.32              | +H | A | 8.29  | -1.03 | 9.1  | -0.2 | 8.71  | -0.61 | 8.47         | -0.85 | 9.1              | -0.2 | 9.28  | -0.04 | 8.79  | -0.53 | 9.50  | 0.18  | 9.18              | -0.14 |
| <b>136</b> | 10.45             | +H | A | 10.36 | -0.09 | 10.0 | -0.4 | 9.94  | -0.51 | 9.70         | -0.75 | 9.8              | -0.6 | 10.04 | -0.41 | 9.78  | -0.67 | 10.40 | -0.05 | 9.90              | -0.55 |
| <b>137</b> | 3.13              | +H | A | 3.21  | 0.08  | 3.5  | 0.4  | 3.39  | 0.26  | 4.79         | 1.66  | 4.0              | 0.9  | 2.70  | -0.43 | 2.96  | -0.17 | 3.09  | -0.04 | 3.20              | 0.07  |
| <b>138</b> | 2.218             | -H | A | 2.28  | 0.06  | 2.3  | 0.1  | 2.21  | -0.01 | 2.41         | 0.19  | 6.0              | 3.8  | 1.73  | -0.49 | 2.13  | -0.09 | 2.72  | 0.50  | 2.32              | 0.10  |
| <b>139</b> | 6.65              | +H | A | 7.14  | 0.49  | 6.9  | 0.3  | 7.16  | 0.51  | 7.94         | 1.29  | 8.2              | 1.6  | 8.63  | 1.98  | 6.64  | -0.01 | 6.69  | 0.04  | 9.09              | 2.44  |
| <b>140</b> | 6.62              | +H | A | 7.15  | 0.53  | 6.9  | 0.3  | 6.92  | 0.30  | 7.94         | 1.32  | 8.5              | 1.9  | 8.55  | 1.93  | 6.64  | 0.02  | 6.62  | 0.00  | 9.09              | 2.47  |
| <b>141</b> | 9.555             | +H | A | 9.43  | -0.13 | 9.4  | -0.2 | 9.39  | -0.16 | 9.09         | -0.47 | 9.3              | -0.3 | 9.67  | 0.12  | 10.08 | 0.53  | 9.60  | 0.04  | 9.08              | -0.48 |
| <b>142</b> | 9.14              | +H | A | 8.58  | -0.56 | 9.2  | 0.1  | 8.96  | -0.18 | 9.32         | 0.18  | 7.9              | -1.2 | 9.52  | 0.38  | 9.06  | -0.08 | 9.19  | 0.05  | 8.86              | -0.28 |
| <b>143</b> | 8.18              | +H | A | 8.25  | 0.07  | 8.0  | -0.2 | 8.21  | 0.03  | 9.37         | 1.19  | <sup>d</sup>     | -    | 9.12  | 0.94  | 7.97  | -0.21 | 8.19  | 0.01  | 9.28              | 1.10  |
|            | 9.4               | -H | A | 9.48  | 0.08  | 9.4  | 0.0  | 9.71  | 0.31  | 11.22        | 1.82  | <sup>d</sup>     | -    | 10.26 | 0.86  | 10.38 | 0.98  | 8.16  | -1.24 | 10.34             | 0.94  |
| <b>144</b> | 8.66              | -H | A | 9.17  | 0.51  | 8.3  | -0.4 | 9.79  | 1.13  | 11.75        | 3.09  | <sup>d</sup>     | -    | 10.47 | 1.81  | 10.65 | 1.99  | 9.8   | 1.14  | 9.53              | 0.87  |
|            | 9.8               | +H | A | 9.54  | -0.26 | 9.7  | -0.1 | 8.54  | -1.26 | 9.89         | 0.09  | <sup>d</sup>     | -    | 9.77  | -0.03 | 9.22  | -0.58 | 9.67  | -0.13 | 10.96             | 1.16  |
| <b>145</b> | 4.44              | +H | A | 4.71  | 0.27  | 4.8  | 0.4  | 1.96  | -2.48 | 5.76         | 1.32  | <sup>d</sup>     | -    | 5.76  | 1.32  | 6.87  | 2.43  | -1.20 | -5.64 | 4.77              | 0.33  |
| <b>146</b> | 2.87              | -H | A | 2.77  | -0.10 | 2.8  | -0.1 | 3.77  | 0.90  | 2.97         | 0.10  | 5.9              | 3.0  | 2.67  | -0.20 | 2.50  | -0.37 | 2.86  | -0.01 | 3.33              | 0.46  |
|            | 8.21              | +H | A | 8.23  | 0.02  | 8.4  | 0.2  | 8.02  | -0.19 | 9.42         | 1.21  | 7.7              | -0.5 | 9.17  | 0.96  | 8.25  | 0.04  | 8.19  | -0.02 | 9.62              | 1.41  |
| <b>147</b> | 2.89              | -H | A | 2.79  | -0.10 | 2.8  | -0.1 | 3.88  | 0.99  | 3.09         | 0.20  | 9.3              | 6.4  | 2.87  | -0.02 | 2.60  | -0.29 | 2.77  | -0.12 | <sup>b</sup>      | -     |

|            |        |    |   |       |       |      |      |       |       |       |       |                  |      |       |       |       |       |              |       |              |       |
|------------|--------|----|---|-------|-------|------|------|-------|-------|-------|-------|------------------|------|-------|-------|-------|-------|--------------|-------|--------------|-------|
|            | 8.14   | +H | A | 8.09  | -0.05 | 8.3  | 0.2  | 7.85  | -0.29 | 9.42  | 1.28  | <sup>d</sup>     | -    | 9.12  | 0.98  | 7.97  | -0.17 | 8.19         | 0.05  | <sup>b</sup> | -     |
|            | 9.36   | -H | A | 9.43  | 0.07  | 9.6  | 0.2  | 9.70  | 0.34  | 11.19 | 1.83  | <sup>d</sup>     | -    | 10.25 | 0.89  | 10.43 | 1.07  | 8.16         | -1.20 | <sup>b</sup> | -     |
| <b>148</b> | 2.05   | -H | A | 2.20  | 0.15  | 2.1  | 0.1  | 1.14  | 0.15  | 2.20  | 0.15  | 4.7              | 2.7  | 2.79  | 0.74  | 2.20  | 0.15  | 0.74         | -1.31 | 1.86         | -0.19 |
|            | 4.83   | +H | A | 4.80  | -0.03 | 4.7  | -0.1 | 5.15  | 0.32  | 5.31  | 0.48  | 2.1              | -2.7 | 4.19  | -0.64 | 4.74  | -0.09 | 3.70         | -1.13 | 4.91         | 0.08  |
| <b>149</b> | 1.77   | -H | A | 1.95  | 0.18  | 2.1  | 0.3  | 2.08  | 0.31  | 0.14  | -1.63 | 3.9              | 2.1  | 3.73  | 1.96  | 0.14  | -1.63 | -0.48        | -2.25 | 2.03         | 0.26  |
|            | 4.87   | +H | A | 4.58  | -0.29 | 4.8  | -0.1 | 4.78  | -0.09 | 5.32  | 0.45  | 3.7              | -1.2 | 2.35  | -2.52 | 5.78  | 0.91  | 4.53         | -0.34 | 4.89         | 0.02  |
| <b>150</b> | 6.51   | -H | A | 5.93  | -0.58 | 5.6  | -0.9 | 6.39  | -0.12 | 7.01  | 0.50  | 4.1              | -2.4 | 6.86  | 0.35  | 8.17  | 1.66  | 5.90         | -0.61 | 4.92         | -1.59 |
| <b>151</b> | 2.92   | +H | A | 2.55  | -0.37 | 2.8  | -0.1 | 2.53  | -0.39 | 5.62  | 2.70  | 1.8              | -1.1 | 2.61  | -0.31 | 3.47  | 0.55  | 2.88         | -0.04 | 3.18         | 0.26  |
|            | 10.525 | -H | A | 11.35 | 0.82  | 10.7 | 0.2  | 10.10 | -0.43 | 10.29 | -0.24 | <sup>b</sup>     | -    | 11.90 | 1.38  | 14.57 | 4.05  | <sup>b</sup> | -     | 9.70         | -0.83 |
| <b>152</b> | 9.05   | +H | A | 8.47  | -0.58 | 8.9  | -0.2 | 9.06  | 0.01  | 8.47  | -0.58 | 9.0              | -0.1 | 9.37  | 0.32  | 9.52  | 0.47  | 9.55         | 0.50  | 9.43         | 0.38  |
| <b>153</b> | 9.19   | +H | A | 8.47  | -0.72 | 8.9  | -0.3 | 9.06  | -0.13 | 8.47  | -0.72 | 9.3              | 0.1  | 9.37  | 0.18  | 9.52  | 0.33  | 9.55         | 0.36  | 9.43         | 0.24  |
| <b>154</b> | 6.43   | +H | A | 6.32  | -0.11 | 5.3  | -1.1 | 6.08  | -0.35 | 5.80  | -0.63 | 7.1              | 0.7  | 6.28  | -0.15 | 6.12  | -0.31 | 5.90         | -0.53 | 7.17         | 0.74  |
| <b>155</b> | 7.83   | +H | A | 9.14  | 1.31  | 8.3  | 0.5  | 10.30 | 2.47  | 9.78  | 1.95  | 10.3             | 2.5  | 9.09  | 1.26  | 8.30  | 0.47  | 7.90         | 0.07  | 8.38         | 0.55  |
| <b>156</b> | 1.67   | +H | A | 0.71  | -0.96 | 3.2  | 1.5  | 1.63  | -0.04 | 5.04  | 3.37  | 3.2              | 1.5  | 2.97  | 1.30  | 1.90  | 0.23  | 8.24         | 6.57  | 2.42         | 0.75  |
|            | 5.5    | +H | A | 8.08  | 2.58  | 6.2  | 0.7  | 7.06  | 1.56  | 6.65  | 1.15  | 1.9              | -3.6 | 8.33  | 2.83  | 7.18  | 1.68  | 4.05         | -1.45 | 8.60         | 3.10  |
| <b>157</b> | 4.53   | -H | A | 4.64  | 0.11  | 4.6  | 0.1  | 5.17  | 0.64  | 10.79 | 6.26  | <sup>b</sup>     | -    | 5.13  | 0.60  | 5.59  | 1.06  | 4.80         | 0.27  | 3.20         | -1.33 |
| <b>158</b> | 10.07  | +H | A | 10.35 | 0.28  | 10.1 | 0.0  | 9.99  | -0.08 | 9.59  | -0.48 | 9.4              | -0.7 | 10.25 | 0.18  | 10.02 | -0.05 | 9.88         | -0.19 | 10.33        | 0.26  |
| <b>159</b> | 6.488  | +H | A | 6.32  | -0.17 | 6.8  | 0.3  | 5.97  | -0.52 | 7.18  | 0.69  | 5.1              | -1.4 | 0.61  | -5.88 | 8.28  | 1.79  | 5.85         | -0.64 | 5.58         | -0.91 |
| <b>160</b> | 2.95   | -H | R | 2.95  | 0.00  | 2.8  | -0.2 | 3.07  | 0.12  | 3.90  | 0.95  | 2.7 <sup>c</sup> | -0.3 | 2.94  | -0.01 | 2.95  | 0.00  | 2.95         | 0.00  | 3.05         | 0.10  |
|            | 5.408  | -H | R | 5.40  | -0.01 | 5.0  | -0.4 | 4.89  | -0.52 | 5.41  | 0.00  | 4.2              | -1.2 | 5.49  | 0.18  | 5.41  | 0.00  | 5.41         | 0.00  | 5.57         | 0.16  |
| <b>161</b> | 8.17   | +H | A | 8.32  | 0.15  | 8.1  | -0.1 | 7.95  | -0.22 | 9.15  | 0.98  | 8.5              | 0.3  | 6.59  | -1.58 | 8.46  | 0.29  | 8.08         | -0.09 | 8.26         | 0.09  |
| <b>162</b> | 0.99   | -H | A | 1.00  | 0.01  | 1.3  | 0.3  | 0.35  | -0.64 | -0.51 | -1.50 | 3.5              | 2.5  | 0.99  | 0.00  | 0.99  | 0.00  | 1.48         | 0.49  | 1.23         | 0.24  |
|            | 5.39   | +H | A | 4.71  | -0.68 | 5.5  | 0.1  | 4.67  | -0.72 | 5.31  | -0.08 | 4.9              | -0.5 | 5.53  | 0.14  | 5.25  | -0.14 | 3.74         | -1.65 | 5.03         | -0.36 |
| <b>163</b> | 7.03   | +H | A | 7.02  | -0.01 | 7.1  | 0.1  | 6.76  | -0.27 | 7.10  | 0.07  | 7.9              | 0.9  | 6.61  | -0.42 | 6.66  | -0.37 | 7.07         | 0.04  | 6.83         | -0.20 |

|            |        |    |   |       |       |      |      |       |       |       |                    |                   |      |       |                    |       |       |       |                   |       |       |
|------------|--------|----|---|-------|-------|------|------|-------|-------|-------|--------------------|-------------------|------|-------|--------------------|-------|-------|-------|-------------------|-------|-------|
| <b>164</b> | 5.333  | +H | R | 5.30  | -0.03 | 5.8  | 0.5  | 5.37  | 0.04  | 5.74  | 0.41               | 6.3               | 1.0  | 5.18  | -0.15              | 5.38  | 0.05  | 5.33  | 0.00              | 5.53  | 0.20  |
|            | 9.731  | +H | R | 9.55  | -0.18 | 9.7  | -0.0 | 10.11 | 0.38  | 10.11 | 0.38               | 10.8 <sup>f</sup> | 0.5  | 9.56  | -0.17              | 9.71  | -0.02 | 9.73  | 0.00              | 9.99  | 0.26  |
| <b>165</b> | 11.123 | +H | R | 10.45 | -0.67 | 10.9 | -0.2 | 10.72 | -0.40 | 10.27 | -0.85              | 11.0              | -0.1 | 10.40 | -0.72              | 10.59 | -0.53 | 10.39 | -0.73             | 10.90 | -0.22 |
| <b>166</b> | 5.07   | -H | A | 4.50  | -0.57 | 5.0  | -0.1 | 5.53  | 0.46  | 5.30  | 0.23               | 10.1              | 5.0  | 1.79  | -3.28 <sup>b</sup> | -     | 5.07  | 0.00  | 7.83              | 2.76  |       |
| <b>167</b> | 2.29   | +H | A | 2.12  | -0.17 | 2.4  | 0.1  | 2.63  | 0.34  | 1.94  | -0.35              | 1.1               | -1.2 | 2.70  | 0.41               | 3.23  | 0.94  | 3.46  | 1.17              | 2.22  | -0.07 |
|            | 9.04   | +H | A | 9.24  | 0.20  | 8.9  | -0.1 | 8.85  | -0.19 | 8.39  | -0.65              | 9.1               | 0.1  | 8.96  | -0.08              | 9.60  | 0.56  | 8.57  | -0.47             | 8.80  | -0.24 |
| <b>168</b> | 9.5    | +H | A | 9.50  | 0.00  | 9.2  | -0.3 | 9.25  | -0.25 | 9.09  | -0.41              | 9.6               | 0.1  | 9.67  | 0.17               | 10.08 | 0.58  | 9.20  | -0.30             | 8.98  | -0.52 |
| <b>169</b> | 9.7    | +H | A | 11.43 | 1.73  | 10.5 | 0.8  | 9.50  | -0.20 | 10.14 | 0.44               | 9.6               | -0.1 | 8.49  | -1.21              | 9.39  | -0.31 | 8.98  | -0.72             | 9.47  | -0.23 |
| <b>170</b> | 8.15   | +H | A | 9.57  | 1.42  | 8.7  | 0.5  | 8.44  | 0.29  | 8.41  | 0.26               | 8.1               | -0.1 | 7.70  | -0.45              | 7.80  | -0.35 | 9.16  | 1.01              | 8.12  | -0.03 |
| <b>171</b> | 10.06  | +H | A | 10.80 | 0.74  | 10.8 | 0.7  | 9.77  | -0.29 | 9.70  | -0.36              | 10.3              | 0.2  | 8.50  | -1.56              | 9.08  | -0.98 | 10.33 | 0.27              | 9.59  | -0.47 |
| <b>172</b> | 10.33  | +H | A | 10.80 | 0.47  | 10.8 | 0.5  | 9.77  | -0.56 | 9.70  | -0.63              | 10.3              | 0.0  | 8.50  | -1.83              | 9.08  | -1.25 | 10.33 | 0.00              | 9.59  | -0.74 |
| <b>173</b> | 9.73   | +H | A | 9.38  | -0.35 | 9.3  | -0.4 | 9.43  | -0.30 | 8.64  | -1.09              | 9.6               | -0.1 | 9.52  | -0.21              | 9.86  | 0.13  | 9.50  | -0.23             | 9.70  | -0.03 |
| <b>174</b> | 4.215  | +H | A | 3.69  | -0.53 | 4.2  | -0.0 | 3.70  | -0.52 | 2.97  | -1.25              | 2.6               | -1.6 | 4.11  | -0.11              | -0.65 | -4.87 | 4.09  | -0.13             | 4.16  | -0.05 |
|            | 8.68   | -H | A | 8.23  | -0.45 | 8.2  | -0.5 | 8.37  | -0.31 | 7.24  | -1.44              | 5.0               | -3.7 | 7.77  | -0.91              | 7.45  | -1.23 | 8.66  | -0.02             | 8.13  | -0.55 |
| <b>175</b> | 4.14   | +H | A | 3.57  | -0.57 | 4.5  | 0.4  | 1.70  | -2.44 | 2.85  | -1.29              | -0.1              | -4.2 | 4.11  | -0.03              | -0.83 | -4.97 | 4.09  | -0.05             | 4.14  | 0.00  |
|            | 6.2    | -H | A | 6.13  | -0.07 | 7.0  | 0.8  | 6.55  | 0.35  | 6.25  | 0.05 <sup>b</sup>  | -                 | -    | 6.68  | 0.48               | 6.42  | 0.22  | 7.90  | 1.70              | 6.31  | 0.11  |
|            | 8.69   | -H | A | 8.22  | -0.47 | 9.0  | 0.3  | 8.32  | -0.37 | 7.30  | -1.39 <sup>d</sup> | -                 | -    | 7.81  | -0.88              | 7.21  | -1.48 | 10.12 | 1.43              | 8.02  | -0.67 |
| <b>176</b> | 3.455  | +H | A | 3.74  | 0.29  | 2.2  | -1.3 | 4.17  | 0.72  | 3.69  | 0.24               | 4.5               | 1.0  | 4.57  | 1.12               | 3.48  | 0.02  | 2.26  | -1.20             | 4.02  | 0.57  |
|            | 8.11   | +H | A | 7.02  | -1.09 | 7.9  | -0.2 | 7.84  | -0.27 | 9.74  | 1.63 <sup>d</sup>  | -                 | -    | 8.02  | -0.09              | 9.41  | 1.30  | 6.74  | -1.37             | 8.20  | 0.09  |
|            | 10.38  | -H | A | 9.98  | -0.40 | 10.1 | -0.3 | 10.35 | -0.03 | 7.70  | -2.68 <sup>d</sup> | -                 | -    | 9.01  | -1.37              | 8.10  | -2.28 | 10.13 | -0.25             | 10.97 | 0.59  |
| <b>177</b> | 8.96   | -H | A | 9.63  | 0.67  | 8.9  | -0.1 | 10.07 | 1.11  | 7.51  | -1.45              | 8.9               | -0.1 | 8.60  | -0.36              | 8.67  | -0.29 | 8.96  | 0.00              | 9.48  | 0.52  |
| <b>178</b> | 4.33   | +H | A | 4.77  | 0.44  | 5.0  | 0.7  | 4.20  | -0.13 | 5.14  | 0.81               | 4.7               | 0.4  | 4.02  | -0.31              | 4.00  | -0.33 | 4.36  | 0.03              | 4.74  | 0.41  |
|            | 8.56   | +H | A | 9.28  | 0.72  | 8.4  | -0.2 | 7.62  | -0.94 | 10.48 | 1.92               | 9.2               | 0.6  | 9.05  | 0.49               | 10.50 | 1.94  | 8.05  | -0.51             | 9.09  | 0.53  |
| <b>179</b> | 9.69   | -H | A | 9.89  | 0.20  | 10.2 | 0.5  | 9.66  | -0.03 | 9.69  | 0.00               | 9.9               | 0.2  | 6.97  | -2.72              | 7.29  | -2.40 | 9.69  | 0.00 <sup>b</sup> | -     | -     |

|            |        |    |   |       |       |      |      |       |       |       |                    |                  |       |       |       |                   |       |       |       |       |       |
|------------|--------|----|---|-------|-------|------|------|-------|-------|-------|--------------------|------------------|-------|-------|-------|-------------------|-------|-------|-------|-------|-------|
| <b>180</b> | 2.78   | -H | A | 3.01  | 0.23  | 3.0  | 0.2  | 3.00  | 0.22  | 3.06  | 0.28               | 3.1              | 0.3   | 2.79  | 0.01  | 2.66              | -0.12 | 2.98  | 0.20  | 3.06  | 0.28  |
| <b>181</b> | 4.5    | -H | A | 4.60  | 0.10  | 4.8  | 0.3  | 4.48  | -0.02 | 4.35  | -0.15              | 3.8              | -0.7  | 5.01  | 0.51  | 4.39              | -0.11 | 4.65  | 0.15  | 4.30  | -0.20 |
| <b>182</b> | 8.29   | -H | A | 8.28  | -0.01 | 8.3  | 0.0  | 9.73  | 1.44  | 8.03  | -0.26 <sup>d</sup> | -                | 10.07 | 1.78  | 9.12  | 0.83              | 9.98  | 1.69  | 9.51  | 1.22  |       |
|            | 9.72   | +H | A | 9.31  | -0.41 | 9.7  | -0.0 | 8.56  | -1.16 | 9.14  | -0.58 <sup>d</sup> | -                | 9.43  | -0.29 | 10.56 | 0.84              | 9.50  | -0.22 | 10.54 | 0.82  |       |
| <b>183</b> | 8.26   | +H | A | 8.37  | 0.11  | 8.1  | -0.2 | 7.45  | -0.81 | 9.80  | 1.54               | 8.8              | 0.5   | 8.37  | 0.11  | 7.88              | -0.38 | 5.60  | -2.66 | 8.39  | 0.13  |
| <b>184</b> | 4.207  | -H | R | 4.24  | 0.03  | 3.8  | -0.4 | 3.75  | -0.46 | 4.63  | 0.42               | 2.7 <sup>e</sup> | -1.5  | 3.55  | -0.66 | 3.86              | -0.35 | 4.20  | -0.01 | 3.97  | -0.24 |
|            | 5.638  | -H | R | 5.52  | -0.12 | 5.3  | -0.3 | 5.45  | -0.19 | 6.55  | 0.91 <sup>d</sup>  | -                | 5.69  | 0.05  | 5.44  | -0.20             | 5.60  | -0.04 | 5.57  | -0.07 |       |
| <b>185</b> | 1.76   | +H | A | 0.93  | -0.83 | 1.9  | 0.1  | 1.81  | 0.05  | 1.51  | -0.25              | 1.8              | 0.0   | 2.14  | 0.38  | 1.87              | 0.11  | 4.16  | 2.40  | 1.64  | -0.12 |
|            | 5.26   | -H | A | 5.43  | 0.17  | 5.3  | 0.0  | 4.76  | -0.50 | 5.07  | -0.19              | 6.7              | 1.4   | 4.30  | -0.96 | 5.01              | -0.25 | 5.40  | 0.14  | 6.86  | 1.60  |
| <b>186</b> | 9.6    | +H | A | 9.37  | -0.23 | 8.8  | -0.8 | 9.03  | -0.57 | 8.33  | -1.27 <sup>d</sup> | -                | 9.15  | -0.45 | 10.47 | 0.87              | 9.31  | -0.29 | 10.63 | 1.03  |       |
| <b>187</b> | 3.033  | -H | R | 3.07  | 0.04  | 3.1  | 0.1  | 3.17  | 0.14  | 3.51  | 0.48               | 2.9              | -0.1  | 2.72  | -0.31 | 2.62              | -0.41 | 3.04  | 0.01  | 2.87  | -0.16 |
|            | 4.366  | -H | R | 4.35  | -0.02 | 4.6  | 0.2  | 4.72  | 0.35  | 5.43  | 1.06 <sup>d</sup>  | -                | 4.79  | 0.42  | 3.93  | -0.44             | 4.37  | 0.00  | 4.53  | 0.16  |       |
| <b>188</b> | 8.65   | +H | A | 9.65  | 1.00  | 10.0 | 1.4  | 8.56  | -0.09 | 9.42  | 0.77 <sup>d</sup>  | -                | 9.75  | 1.10  | 12.01 | 3.36              | 10.59 | 1.94  | 10.22 | 1.57  |       |
| <b>189</b> | 8.65   | +H | A | 9.41  | 0.76  | 9.0  | 0.4  | 8.92  | 0.27  | 9.82  | 1.17 <sup>d</sup>  | -                | 9.41  | 0.76  | 9.48  | 0.83              | 10.35 | 1.70  | 9.35  | 0.70  |       |
| <b>190</b> | 8.55   | -H | A | 8.60  | 0.05  | 8.9  | 0.4  | 10.63 | 2.08  | 12.42 | 3.87 <sup>b</sup>  | -                | 11.34 | 2.79  | 10.96 | 2.41 <sup>b</sup> | -     | 10.78 | 2.23  |       |       |
| <b>191</b> | 8.08   | +H | R | 7.78  | -0.30 | 8.1  | 0.0  | 8.22  | 0.14  | 7.50  | -0.58              | 9.4              | 1.3   | 8.95  | 0.87  | 7.81              | -0.27 | 8.08  | 0.00  | 8.15  | 0.07  |
| <b>192</b> | 2.36   | -H | A | 2.30  | -0.06 | 2.1  | -0.3 | 2.27  | -0.09 | 2.05  | -0.31              | 7.4              | 5.0   | 2.54  | 0.18  | 2.29              | -0.07 | 2.29  | -0.07 | 2.47  | 0.11  |
|            | 9.42   | +H | A | 9.71  | 0.29  | 9.4  | -0.0 | 8.89  | -0.53 | 9.31  | -0.11              | 8.0              | -1.4  | 9.40  | -0.02 | 9.58              | 0.16  | 9.30  | -0.12 | 9.90  | 0.48  |
| <b>193</b> | 2.06   | -H | A | 2.25  | 0.19  | 2.1  | 0.0  | 2.29  | 0.23  | 2.45  | 0.39               | 6.7              | 4.6   | 2.00  | -0.06 | 2.16              | 0.10  | 2.18  | 0.12  | 2.31  | 0.25  |
|            | 9.145  | +H | A | 9.09  | -0.05 | 9.0  | -0.1 | 8.84  | -0.31 | 9.21  | 0.07 <sup>d</sup>  | -                | 9.19  | 0.04  | 9.71  | 0.57              | 9.21  | 0.07  | 9.30  | 0.16  |       |
|            | 10.265 | -H | A | 10.01 | -0.26 | 10.2 | -0.1 | 10.02 | -0.25 | 10.38 | 0.12 <sup>d</sup>  | -                | 9.79  | -0.48 | 9.43  | -0.84             | 10.47 | 0.21  | 10.47 | 0.21  |       |
| <b>194</b> | 7.396  | -H | R | 7.78  | 0.38  | 7.6  | 0.2  | 8.91  | 1.51  | 7.62  | 0.22               | 7.6              | 0.2   | 7.81  | 0.41  | 7.59              | 0.19  | 7.25  | -0.15 | 7.79  | 0.39  |
| <b>195</b> | 8.889  | -H | A | 9.25  | 0.36  | 8.7  | -0.2 | 9.53  | 0.64  | 9.12  | 0.23               | 9.2              | 0.3   | 9.39  | 0.50  | 8.98              | 0.09  | 8.89  | 0.00  | 9.18  | 0.29  |
| <b>196</b> | 7.912  | -H | A | 8.18  | 0.27  | 7.9  | -0.0 | 7.98  | 0.07  | 8.25  | 0.34               | 7.7              | -0.2  | 8.74  | 0.83  | 8.17              | 0.26  | 7.91  | 0.00  | 7.58  | -0.33 |

---

|            |      |    |   |      |       |     |      |      |      |      |      |     |      |      |       |      |       |      |       |      |      |
|------------|------|----|---|------|-------|-----|------|------|------|------|------|-----|------|------|-------|------|-------|------|-------|------|------|
| <b>197</b> | 5.02 | -H | A | 4.50 | -0.52 | 5.0 | -0.0 | 5.86 | 0.84 | 5.92 | 0.90 | 4.2 | -0.8 | 3.83 | -1.19 | 4.54 | -0.48 | 5.00 | -0.02 | 5.69 | 0.67 |
|------------|------|----|---|------|-------|-----|------|------|------|------|------|-----|------|------|-------|------|-------|------|-------|------|------|

---

<sup>a</sup> Dev = calculated  $pK_a$  value (Cal) – experimental  $pK_a$  value. <sup>b</sup> Program failed to predict the value. <sup>c</sup> Average of results for ionization of the 2' and 3' –OH groups of the ribose. <sup>d</sup> Site was not calculated because of complexity. <sup>e</sup> Correction factor (-0.60) was applied. <sup>f</sup> Correction factor (+0.60) was applied. <sup>g</sup> The enol group was tautomerized to a carbonyl group by the program when calculating. <sup>h</sup> Value is for the mesomer. <sup>i</sup> Value was measured at 20 °C. <sup>j</sup> Value was calculated for 20 °C (the value calculated for 25 °C is 7.00)
